# Supplementary material for: Effect of temperature on the thermodynamic and spectroscopic properties of Np(v) complexes with picolinate
Source: Royal Society of Chemistry journal article supplement (doi:10.1039/c5ra12424g), 2015-01-01
Supplement: c5ra12424g1.pdf [file c5ra12424g1.pdf]

### Electronic Supplementary Information (ESI)

**Table S1** Potentiometric titration conditions for the pKa determination of picolinate (denoted as HL)

| Titration No. | $T$ , K | $C_L^0$ , mM | $C_H^0$ , mM | $V^0$ , mL | $C_{\text{titrant}}(\text{NaOH})$ , mM | $V_{\text{titrant}}$ , mL |
|---------------|---------|--------------|--------------|------------|----------------------------------------|---------------------------|
| 1             | 283     | 8.395        | 9.056        | 18.13      | 101.0                                  | 2.00                      |
| 2             | 298     | 8.400        | 9.073        | 18.12      | 101.0                                  | 2.00                      |
| 3             | 313     | 8.405        | 9.056        | 18.12      | 101.5                                  | 2.00                      |
| 4             | 328     | 8.355        | 9.045        | 18.12      | 101.5                                  | 2.00                      |
| 5             | 343     | 12.69        | 13.65        | 24.14      | 101.5                                  | 3.50                      |

**Table S2** Calorimetric titration conditions for the enthalpy determination of picolinate (denoted as HL) protonation

| Titration No. | $T$ , K | $C_L^0$ , mM | $C_H^0$ , mM | $V^0$ , mL | $C_{\text{titrant}}(\text{HClO}_4)$ , mM | $V_{\text{titrant}}$ , mL |
|---------------|---------|--------------|--------------|------------|------------------------------------------|---------------------------|
| 1             | 298     | 13.49        | 1.300        | 0.900      | 91.5                                     | 0.230                     |
| 2             | 298     | 61.50        | 5.911        | 0.900      | 91.5                                     | 0.220                     |

**Table S3** Selected speciation data points of Fig. 4. Speciation simulation conditions:  $C_{\text{Np}} = 0.10$  M (constant),  $C_L = 0.30$  M (constant), pH varied from 0.5 to 5.0,  $I = 1.0$  M  $\text{NaClO}_4$

| pH    | Molar Fraction (%), relevant to total concentration of Np) |       |                                   |       |                            |       |
|-------|------------------------------------------------------------|-------|-----------------------------------|-------|----------------------------|-------|
|       | $\text{NpO}_2^+$                                           |       | $\text{NpO}_2\text{L}(\text{aq})$ |       | $\text{NpO}_2\text{L}_2^-$ |       |
|       | 298 K                                                      | 343 K | 298 K                             | 343 K | 298 K                      | 343 K |
| 0.500 | 97.23                                                      | 97.93 | 2.76                              | 2.07  | 0.01                       | 0.00  |
| 0.725 | 95.46                                                      | 96.58 | 4.52                              | 3.40  | 0.02                       | 0.01  |
| 0.950 | 92.65                                                      | 94.42 | 7.30                              | 5.55  | 0.05                       | 0.03  |
| 1.175 | 88.36                                                      | 91.04 | 11.51                             | 8.87  | 0.13                       | 0.09  |
| 1.400 | 82.11                                                      | 85.96 | 17.55                             | 13.81 | 0.33                       | 0.23  |
| 1.625 | 73.63                                                      | 78.76 | 25.58                             | 20.68 | 0.79                       | 0.57  |
| 1.850 | 63.04                                                      | 69.28 | 35.21                             | 29.41 | 1.75                       | 1.31  |
| 2.075 | 51.07                                                      | 57.93 | 45.34                             | 39.29 | 3.59                       | 2.79  |
| 2.300 | 38.88                                                      | 45.64 | 54.35                             | 48.88 | 6.77                       | 5.48  |
| 2.525 | 27.73                                                      | 33.70 | 60.51                             | 56.41 | 11.77                      | 9.89  |
| 2.750 | 18.50                                                      | 23.27 | 62.61                             | 60.34 | 18.88                      | 16.38 |
| 2.975 | 11.57                                                      | 15.04 | 60.37                             | 59.94 | 28.06                      | 25.02 |
| 3.200 | 6.80                                                       | 9.12  | 54.41                             | 55.50 | 38.79                      | 35.38 |
| 3.425 | 3.76                                                       | 5.21  | 46.04                             | 48.15 | 50.19                      | 46.64 |
| 3.650 | 1.97                                                       | 2.81  | 36.76                             | 39.40 | 61.27                      | 57.79 |
| 3.875 | 0.97                                                       | 1.45  | 27.85                             | 30.65 | 71.18                      | 67.90 |
| 4.100 | 0.46                                                       | 0.72  | 20.16                             | 22.90 | 79.39                      | 76.38 |
| 4.325 | 0.21                                                       | 0.35  | 14.08                             | 16.67 | 85.71                      | 82.98 |
| 4.550 | 0.09                                                       | 0.17  | 9.62                              | 12.04 | 90.29                      | 87.79 |
| 4.775 | 0.04                                                       | 0.09  | 6.54                              | 8.82  | 93.42                      | 91.09 |
| 5.000 | 0.02                                                       | 0.05  | 4.52                              | 6.69  | 95.47                      | 93.26 |

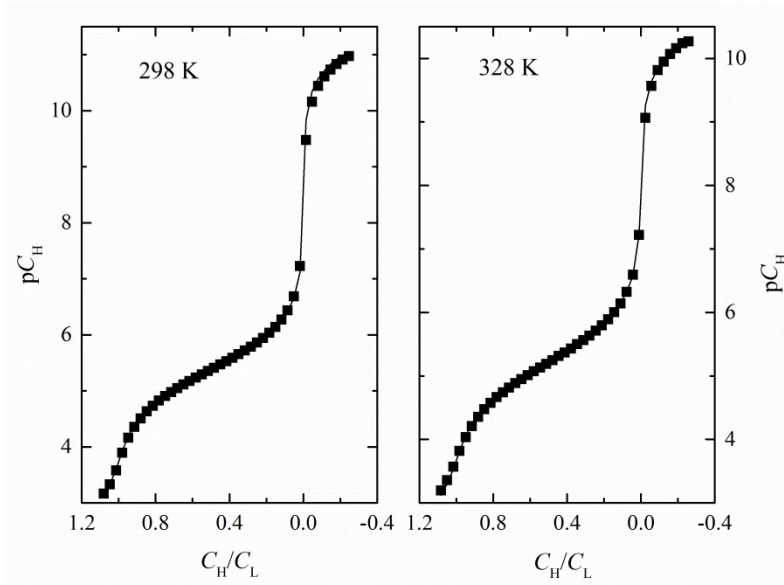

**Fig. S1** Fitting of potentiometric titration data for the  $pK_a$  determination at 298 and 328 K. Experimental conditions can be found in Table S1. Symbol (■): measured; solid line: calculated

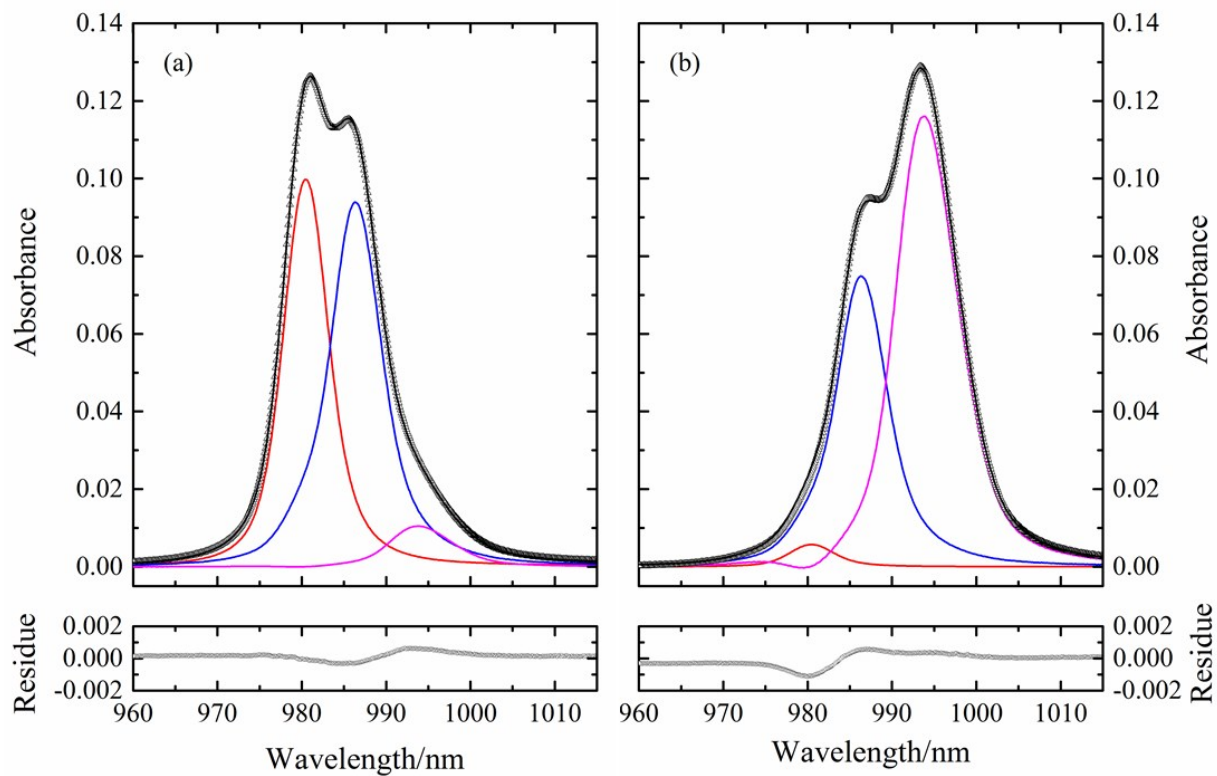

Fig. S2 Spectrum deconvoluted results from the 298 K spectrophotometric titration. (a)  $V_{\text{titrant}} = 0.030$  mL; (b)  $V_{\text{titrant}} = 0.110$  mL. The detailed titration conditions could be found in Table S1. Symbol ( $\Delta$ ): observed absorbance; Solid lines: Calculated absorbance (black), deconvoluted absorbance of  $\text{NpO}_2^+$  (red),  $\text{NpO}_2\text{L}(\text{aq})$  (blue) and  $\text{NpO}_2\text{L}_2^-$  (magenta).

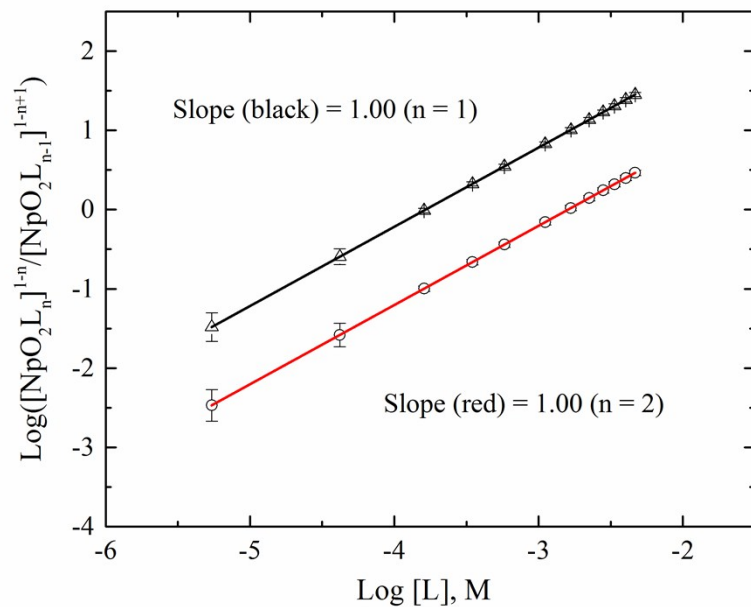

Fig. S3 Slope analysis for the stepwise formation of  $\text{NpO}_2(\text{L})_n^{1-n}$  ( $n=1,2$ ) in the spectrophotometric titration at 298 K. (L = picolinate)

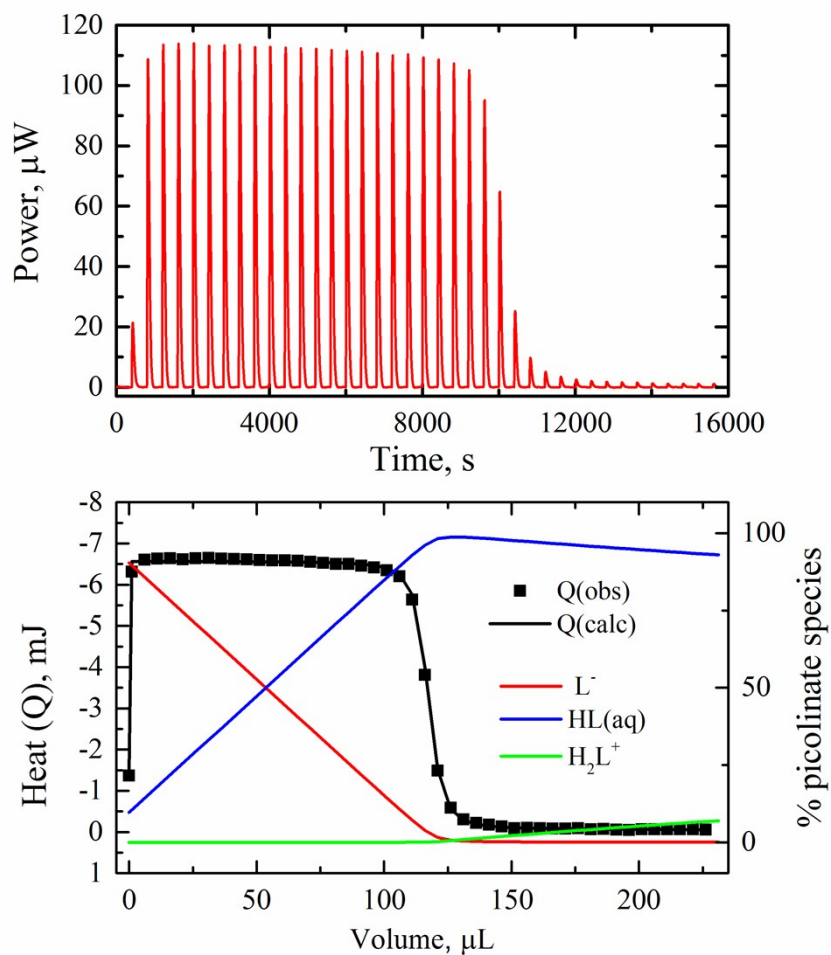

**Fig. S4** Calorimetric titration of picolinate protonation (titration NO. 2 in Table S2). Upper graph: thermogram (dilution heat not corrected); lower graph: fitting and speciation. Note: the second protonation of picolinate was included in the fitting using its literature protonation constant  $\log K_{H2} = 0.95$ .<sup>16</sup> The resulting enthalpy value is  $-(1.65 \pm 1.2) \text{ kJ}\cdot\text{mol}^{-1}$ , which quite well agrees with the literature value ( $-2.1 \text{ kJ}\cdot\text{mol}^{-1}$  from the Martel database<sup>16</sup>).
